# Supplementary material
Source: Springer Nature journal article supplement (https://www.springermedizin.de/resource/supplementary/12958_2009_601_MOESM5_ESM.pdf/9568068)

**A**

Response (RU)

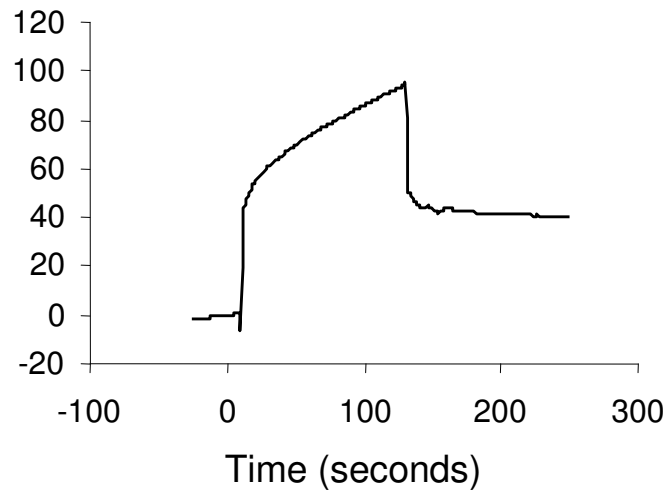**B**

Response (RU)

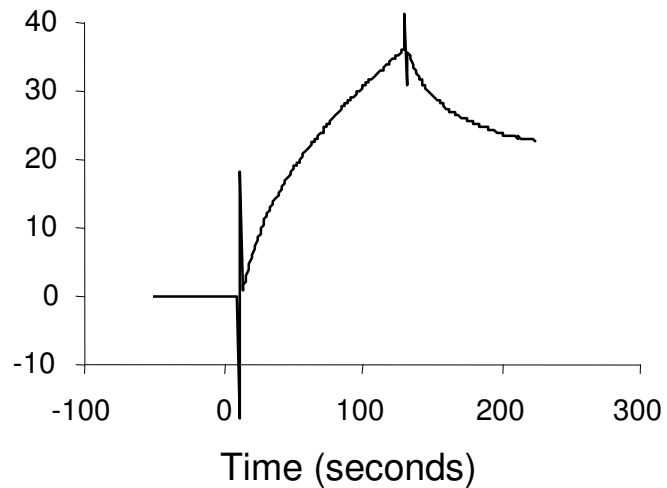**C**

stage 1    stage 2    stage 3

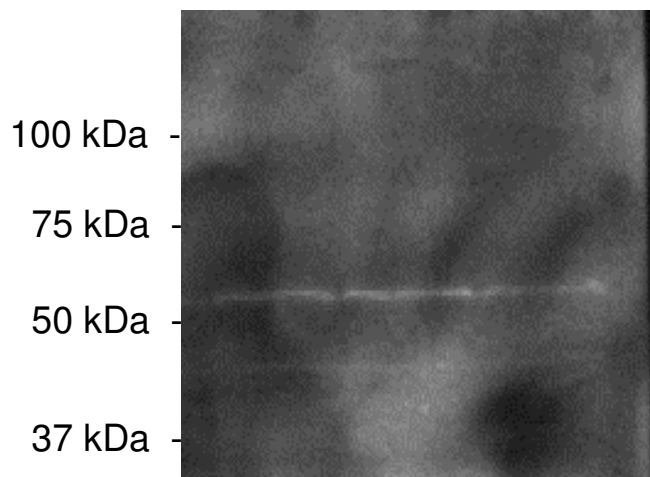**D**

stage 1    stage 2    stage 3

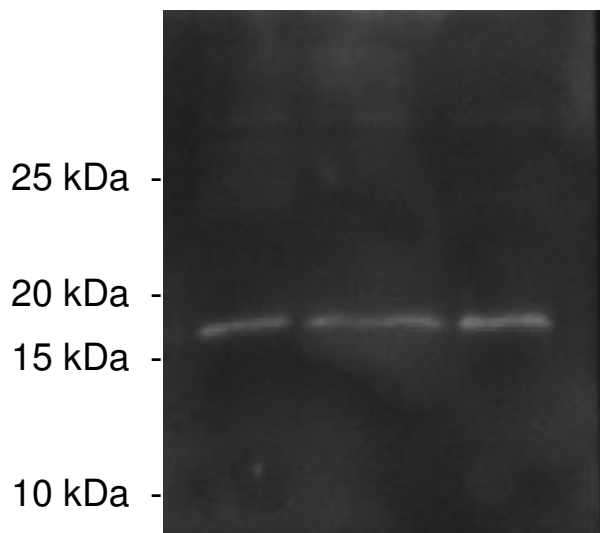

Supplement: MOESM5 [file 9568068]
